# Supplementary material for: Isolation and functional analyses of PvFAD2 and PvFAD3 involved in the biosynthesis of polyunsaturated fatty acids from Sacha Inchi (Plukenetia volubilis)
Source: PeerJ journal article supplement (doi:10.7717/peerj.9169), 2020-05-26
Supplement: Table_S1.pdf [file Table_S1.pdf]

Table S1. Primers used in this study.

| Unigenes     | Sequences (5'-3')                          | Purpose                  |
|--------------|--------------------------------------------|--------------------------|
| PvFAD2-F     | ATGGGTGCTGGTGGCAGAATGTC                    | gene clone               |
| PvFAD2-R     | CGCGGTCAAAACTTGTTTTGTACC                   | gene clone               |
| PvFAD3-F1    | GTGGTCAAGGAGTCCAGGCAAAGAAGGT               | 3' RACE                  |
| PvFAD3-F2    | ACCCCAAACGAAAGGAGAGCAGTGATGA               | 3' RACE                  |
| PvFAD3-R1    | GTGAACCTTCTTTGCCTGGACTCCTTGA               | 5' RACE                  |
| PvFAD3-R2    | GCAAGCAAAGGGAGAGGCAGCGTGA                  | 5' RACE                  |
| PvFAD3-F     | CTGCTCTAGCTCTTCCTCTGTCTCT                  | Full-length              |
| PvFAD3-R     | TGCTACATGACTGTCTGTATCCTGT                  | Full-length              |
| GFP-FAD2F    | acgagctgtacaagcctaggATGGGTGCTGGTGGCAGAAT   | Subcellular Localization |
| GFP-FAD2R    | gtcacctgtaattcacagtgATCAAAACTTGTTTTGTACCAG | Subcellular Localization |
| GFP-FAD3F    | acgagctgtacaagcctaggATGCAGACCATGGATATTTCC  | Subcellular Localization |
| GFP-FAD3R    | gtcacctgtaattcacagtgTTAAACTAACTTGGTTTTTGCC | Subcellular Localization |
| Napin- FAD2F | GCTCTAGAATGGGTGCTGGTGGCAGAAT               | Pant expression          |
| Napin- FAD2R | AAAAGTGCAGTCAAAACTTGTTTTGTACCAGAAG         | Pant expression          |
| Napin- FAD3F | GCTCTAGAATGCAGACCATGGATATTTCC              | Pant expression          |
| Napin- FAD3R | AAAAGTGCAGTTAAACTAACTTGGTTTTTGCCAA         | Pant expression          |
| P426-PvFAD2F | gattctagaactagtgatccATGGGTGCTGGTGGCAGAAT   | Yeast expression         |
| P426-PvFAD2R | cgataagcttgatcgaattcATCAAAACTTGTTTTGTACCAG | Yeast expression         |
| P426-PvFAD3F | gattctagaactagtgatccATGCAGACCATGGATATTTCC  | Yeast expression         |
| P426-PvFAD3R | cgataagcttgatcgaattcTTAAACTAACTTGGTTTTTGCC | Yeast expression         |
| P426-F       | GGTTGAAACCAGTTCCTGA                        | Sequence                 |
| P426-R       | GGTTGAAACCAGTTCCTGA                        | Sequence                 |
| qRT-FAD2F    | TGACGATGTGTTGAAGCGAG                       | qRT-PCR                  |
| qRT-FAD2R    | GTGGAAGAAACTGGTGGCAA                       | qRT-PCR                  |
| qRT-FAD3F    | GACCCTAGCAATCCTCCTCC                       | qRT-PCR                  |
| qRT-FAD3R    | GCACAATGAATCGAAGCAAAGA                     | qRT-PCR                  |
| Actin-F      | AAGGGATGCGAGGATGGA                         | qRT-PCR                  |
| Actin-R      | CAAGGAAATCACCGCTTTGG                       | qRT-PCR                  |
