# Supplementary material for: Isolation and functional analyses of PvFAD2 and PvFAD3 involved in the biosynthesis of polyunsaturated fatty acids from Sacha Inchi (Plukenetia volubilis)
Source: PeerJ journal article supplement (doi:10.7717/peerj.9169), 2020-05-26
Supplement: Table_S2.pdf [file Table_S2.pdf]

Table S2. FAD proteins used in sequence alignment and phylogenetic analysis.

| Species                     | Lable    | Acession Number | Per. Ident | E value |
|-----------------------------|----------|-----------------|------------|---------|
| <i>Arabidopsis thaliana</i> | AtFAD8   | AT5G05580       |            |         |
| <i>Arabidopsis thaliana</i> | AtFAD2   | AAA32782.1      | 75%        | 0.0     |
| <i>Arabidopsis thaliana</i> | AtFAD3   | BAA05514.1      | 70.78%     | 0.0     |
| <i>Arabidopsis thaliana</i> | AtFAD7   | AT3G11170       |            |         |
| <i>Arabidopsis thaliana</i> | AtFAD6   | AAA92800.1      |            |         |
| <i>Oryza sativa</i>         | OsFAD3   | BAA11397        | 68.44%     | 1e-175  |
| <i>Oryza sativa</i>         | OsFAD2   | ACN87220.1      | 69.13%     | 0.0     |
| <i>Oryza sativa</i>         | OsFAD8   | BAE79785        |            |         |
| <i>Oryza sativa</i>         | OsFAD6   | BAD09897        |            |         |
| <i>Oryza sativa</i>         | OsFAD7   | BAE79784.1      |            |         |
| <i>Zea mays</i>             | ZmFAD2   | ABF50053.1      | 69.31%     | 0.0     |
| <i>Zea mays</i>             | ZmFAD7   | BAA22441.1      |            |         |
| <i>Zea mays</i>             | ZmFAD8   | BAA22442.1      |            |         |
| <i>Zea mays</i>             | ZmFAD6   | DAA48913        |            |         |
| <i>Zea mays</i>             | ZmFAD3   | NP_001149938    | 71.51%     | 4e-173  |
| <i>Brassica napus</i>       | BnFAD3   | AAA61775.1      | 72.01%     | 0.0     |
| <i>Brassica napus</i>       | BnFAD2   | ACP39502.1      | 77.66%     | 0.0     |
| <i>Brassica napus</i>       | BnFAD6   | AAT65203        |            |         |
| <i>Brassica napus</i>       | BnFAD7   | ACS26170        |            |         |
| <i>Brassica napus</i>       | BnFAD8   | ACS26172        |            |         |
| <i>Glycine max</i>          | GmFAD3A  | AAO24263.1      | 75.50%     | 0.0     |
| <i>Glycine max</i>          | GmFAD3B  | ABV00679.1      | 73.89%     | 0.0     |
| <i>Glycine max</i>          | GmFAD3C  | ABV00681.1      | 77.31%     | 0.0     |
| <i>Glycine max</i>          | GmFAD2-2 | AAB00860.1      | 80.73%     | 0.0     |
| <i>Glycine max</i>          | GmFAD2-1 | AAB00859.1      | 81.25%     | 0.0     |
| <i>Glycine max</i>          | GmFAD6   | AAA50158.1      |            |         |
| <i>Glycine max</i>          | GmFAD7-1 | ACS15381.1      |            |         |
| <i>Glycine max</i>          | GmFAD7-2 | ACF19424.1      |            |         |
| <i>Medicago truncatula</i>  | MtFAD2-1 | Medtr1g054035.1 | 76.36%     | 0.0     |
| <i>Medicago truncatula</i>  | MtFAD2-2 | Medtr1g111880.1 | 67.45%     | 0.0     |
| <i>Medicago truncatula</i>  | MtFAD2-3 | Medtr7g093200.1 | 77.40%     | 0.0     |
| <i>Medicago truncatula</i>  | MtFAD3-1 | Medtr3g464330.1 | 72.30%     | 0.0     |
| <i>Medicago truncatula</i>  | MtFAD3-2 | Medtr5g071170.1 | 71.77%     | 0.0     |
| <i>Medicago truncatula</i>  | MtFAD7-1 | Medtr4g015630.1 |            |         |
| <i>Medicago truncatula</i>  | MtFAD7-2 | Medtr7g068780.1 |            |         |
| <i>Medicago truncatula</i>  | MtFAD6   | Medtr4g130980.1 |            |         |
| <i>Solanum lycopersicum</i> | SIFAD2   | XP_004228665    | 75.26%     | 0.0     |
| <i>Solanum lycopersicum</i> | SIFAD3   | ABX24525        | 73.26%     | 0.0     |
| <i>Solanum lycopersicum</i> | SIFAD6   | XP_004242585    |            |         |
| <i>Solanum lycopersicum</i> | SIFAD7   | NP_001234592    |            |         |

|                                |          |                |        |        |
|--------------------------------|----------|----------------|--------|--------|
| <i>Solanum lycopersicum</i>    | SIFAD3   | ABX24525.1     | 73.26% | 0.0    |
| <i>Nicotiana tabacum</i>       | NtFAD2   | AAT72296       | 76.82% | 0.0    |
| <i>Nicotiana tabacum</i>       | NtFAD6   | AIA22326       |        |        |
| <i>Nicotiana tabacum</i>       | NtFAD7   | AIA22325       |        |        |
| <i>Nicotiana tabacum</i>       | NtFAD3   | BAA05515.1     | 69.55% | 0.0    |
| <i>Olea europaea</i>           | OeFAD3   | ABG88130.2     | 72.38% | 0.0    |
| <i>Olea europaea</i>           | OeFAD2-2 | AAW63041.1     | 76.04% | 0.0    |
| <i>Olea europaea</i>           | OeFAD2-1 | AAW63040.1     | 78.65% | 0.0    |
| <i>Olea europaea</i>           | OeFAD6   | AAW63039.1     |        |        |
| <i>Olea europaea</i>           | OeFAD7   | ABG88131.1     |        |        |
| <i>Olea europaea</i>           | OeFAD8   | XP_022887446.1 |        |        |
| <i>Jatropha curcas</i>         | JcFAD3   | ABX82798.1     | 79.30% | 0.0    |
| <i>Jatropha curcas</i>         | JcFAD2   | ACR15954.1     | 75.78% | 0.0    |
| <i>Jatropha curcas</i>         | JcFAD7   | ABE72960.1     |        |        |
| <i>Jatropha curcas</i>         | JcFAD8   | ABU96743.1     |        |        |
| <i>Ricinus communis</i>        | RcFAD7   | AAA73511.1     |        |        |
| <i>Ricinus communis</i>        | RcFAD6   | XP_002532960.1 |        |        |
| <i>Ricinus communis</i>        | RcFAD2   | ABK59093.1     | 86.49% | 0.0    |
| <i>Ricinus communis</i>        | RcFAD3   | EEF36775.1     | 87.07% | 0.0    |
| <i>Vernicia fordii</i>         | VfFAD3   | AF047172.2     | 79.72% | 0.0    |
| <i>Perilla frutescens</i>      | PfFAD3A  | AAL36934.1     | 69.52% | 0.0    |
| <i>Perilla frutescens</i>      | PfFAD3B  | AAD15744.1     | 71.79% | 0.0    |
| <i>Triticum aestivum</i>       | TaFAD3   | BAA28358.1     | 71.55% | 0.0    |
| <i>Triticum aestivum</i>       | TaFAD7   | BAA07785.3     |        |        |
| <i>Brachypodium distachyon</i> | BdFAD2-1 | XP_010231291.2 | 68.62% | 0.0    |
| <i>Brachypodium distachyon</i> | BdFAD2-2 | XP_003570235.1 | 68.80% | 0.0    |
| <i>Brachypodium distachyon</i> | BdFAD8   | XP_003558157.1 |        |        |
| <i>Brachypodium distachyon</i> | BdFAD7   | XP_003562400.1 |        |        |
| <i>Brachypodium distachyon</i> | BdFAD3   | XP_003577162.1 | 68.75% | 6E-179 |
| <i>Brachypodium distachyon</i> | BdFAD6   | XP_003574539.1 |        |        |
| <i>Linum usitatissimum</i>     | LuFAD3A  | ABA02172.1     | 93%    | 0.0    |
| <i>Linum usitatissimum</i>     | LuFAD3B  | ABA02173.1     | 74.87% | 0.0    |
